# Supplementary material
Source: PubMed Central journal article supplement (PMC3623239)
Supplement: AEM.03895-12_zam999104273so1.pdf [file AEM.03895-12_zam999104273so1.pdf]

1 Table S1. Primers used in this study<sup>a</sup>

|                  |                                                             |
|------------------|-------------------------------------------------------------|
| pETKm_Rsrl-for   | 5'-CTTGAT <u>CGGACCGA</u> ACTCACGTTAAGGGATTTTG-3'           |
| pETKm_Apal-rev   | 5'-CATGTAG <u>GGCC</u> ATTCAAATATGTATCCGCTCA-3'             |
| 3481 Spel up-for | 5'-GAGTTG <u>ACTAGT</u> GCTCCTGTTCTGCGACACG-3'              |
| 3481 up-rev      | 5'-GGTACCGAACTGGAACACGTGTGC-3'                              |
| 3481 dn-for      | 5'-GCGCACGATGAGACTCCATTCG-3'                                |
| 3481 SacI dn-rev | 5'-GCCTAT <u>GAGCT</u> CAAATGCCGCTGACCACCACG-3'             |
| 3628 Spel up-for | 5'-GCATGA <u>ACTAGT</u> CTGACTCCACCTACATCCAGCACC-3'         |
| 3628 up-rev      | 5'-GTTACGCATGGGTGATAGTCCGCAG-3'                             |
| 3628 dn-for      | 5'-AGCGAAGAACTGACCAGCACGG-3'                                |
| 3628 SacI dn-rev | 5'-CCTGAT <u>GAGCT</u> CCGACCTGCCTTACAAGCGTGG-3'            |
| 3628 HindIII-F   | 5'-GTACTA <u>AGCTT</u> CCCTGCGGACTATCACCCATGCG-3'           |
| 3628 BamHI-R     | 5'-GTACT <u>CGGATC</u> CTCAGCGGTTGAAGCGCTCCACC-3'           |
| Paa_Prom_For     | 5'-ATGCGGTACCGTCGATAGCAAGGCATGGCAACACTCC-3'                 |
| Paa_Prom_Rev     | 5'-AGTCGAATTCTAATCACTGTGGCCCGGACATGCTCGTC-3'                |
| pEX_paaF_del_for | 5'-CGACGGCCAGTGCCA <u>AAGCTT</u> GTGGTTCGAGCATGACGAGCAC-3'  |
| paaF_del_for     | 5'-CAAGAACAATTCGAGTGAAGCCACGCGCTGATGCAGGCGCAGC-3'           |
| paaF_del_rev     | 5'-GCTGCGCCTGCATCAGCGCGTGGCTTCACTCGAATTGTTCTTG-3'           |
| pEX_paaF_del_rev | 5'-GCTATGACCATGATTAC <u>GAATTC</u> CTTCTTGCAGATACGG-3'      |
| paaF_For_HindIII | 5'-AGCTA <u>AGCTT</u> CCATGACACTCACCGCGTGGCCTG-3'           |
| paaF_Rev_BamHI   | 5'-AGCT <u>GGATCC</u> GCCGATTGGGTTCAGCTGGCCAACC-3'          |
| pEX_paal_del_for | 5'-CGACGGCCAGTGCCA <u>AAGCTT</u> GCACAGCGGCAAGGCCAAGTAC-3'  |
| paal_del_for     | 5'-CGGACACATGTGAGGTGGGCCACTGATTGCCGGCGACCGCGG-3'            |
| paal_del_rev     | 5'-CCGCGGTGCGCCGGCAATCAGTGGCCACCTCACATGTGTCCG-3'            |
| pEX_paal_del_rev | 5'-GCTATGACCATGATTAC <u>GAATTC</u> GAACTGGAGCGGTTGCCGTAC-3' |
| paal_For_HindIII | 5'-AGCTA <u>AGCTT</u> CCATGCCAGCTTCTACGAGCTGCC-3'           |
| paal_Rev_BamHI   | 5'-AGCT <u>GGATCC</u> GCGGTCGCCGGCAATCAGTTCACC-3'           |

2 <sup>a</sup> Restriction sites are underlined.
